# Supplementary material for: Clinical and Molecular Epidemiology of Staphylococcus argenteus Infections in Thailand
Source: PubMed Central journal article supplement (PMC4390622; doi:10.1128/jcm.03049-14), 2015-02-19
Supplement: JCM.03049-14_zjm999094096so4.pdf [file JCM.03049-14_zjm999094096so4.pdf]

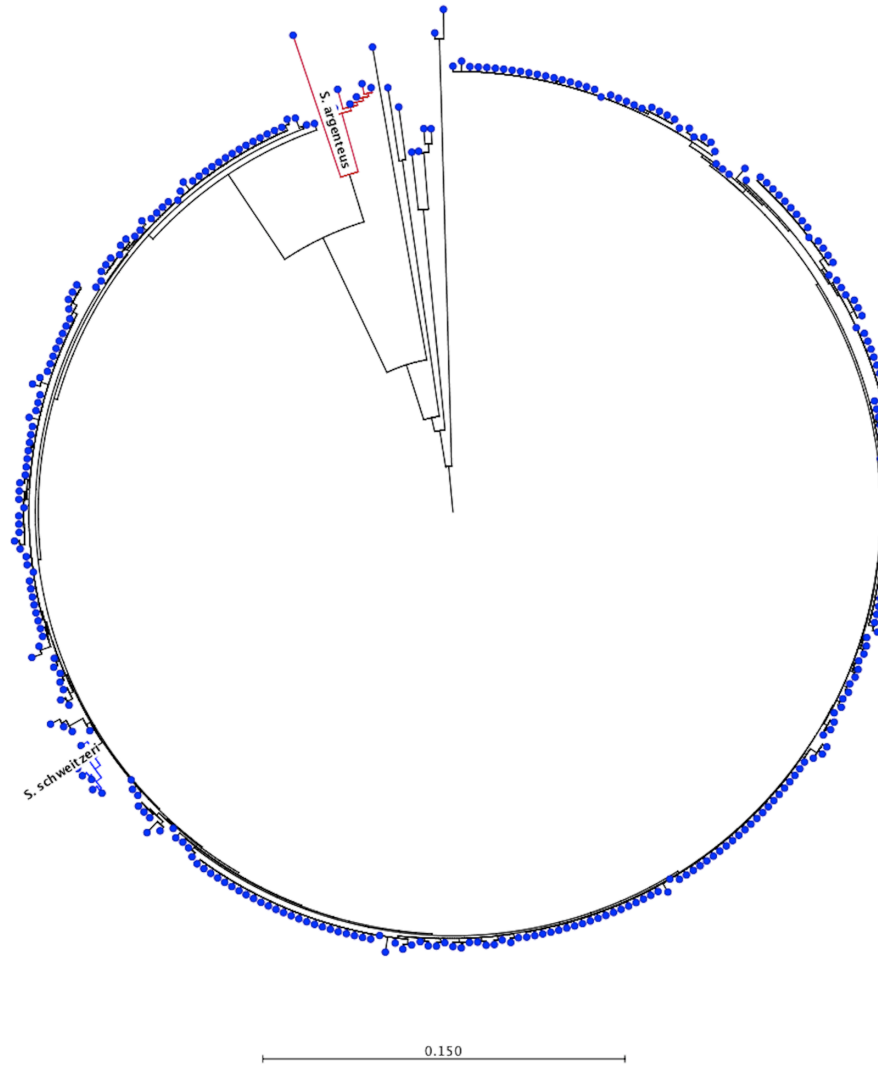

**Supplementary Figure 2. Phylogenetic tree of *pta***

Phylogenetic tree based on all of the available allele sequences for *pta*, one of the seven *S. aureus* MLST loci. The tree demonstrates several divergence branches. One of these is a cluster of *S. argenteus* that is distinct and genetically distant from *S. aureus*. Eight alleles associated with known *S. argenteus* isolates are in the cluster. *S. schweitzeri* and *S. aureus* are genetically close related based on *pta* locus.
